1 **Tobacco Smoking and Associated Factors among In-school Adolescents in**  
2 **Vietnam in 2013, 2019**

3

4 Hoang Van Minh<sup>1</sup>, Khuong Quynh Long<sup>1</sup>, Do Van Vuong<sup>1</sup>, Nguyen Manh Hung<sup>1</sup>, Kidong  
5 Park<sup>2</sup>, Momoe Takeuchi<sup>2</sup>, Mina Kashiwabara<sup>2</sup>, Nguyen Tuan Lam<sup>2</sup>, Pham Thi Quynh Nga<sup>2</sup>, Le  
6 Phuong Anh<sup>2</sup>, Le Van Tuan<sup>3</sup>, Tran Quoc Bao<sup>4</sup>, Le Duong Minh Anh<sup>5</sup>, Tran Thi Tuyet Hanh<sup>1</sup>

7

8 <sup>1</sup>Hanoi University of Public Health, Hanoi, 10000, Vietnam

9 <sup>2</sup>World Health Organization, Country Office for Viet Nam, Hanoi, 10000, Viet Nam

10 <sup>3</sup>Vietnam Ministry of Education and Training, Hanoi, 100000, Vietnam

11 <sup>4</sup>General Department of Preventive Medicine, Ministry of Health, Hanoi, 100000, Vietnam

12 <sup>5</sup>High school for Gifted student, Hanoi University of Science, Vietnam National University.

13

## 14 **Abstract**

15 Tobacco smoking is one of the most dangerous risk behaviors, leading to many adverse human  
16 health consequences. The aims of this study is to estimate the prevalence of tobacco smoking  
17 and related factor among adolescents aged 13–17 years in Vietnam. The data were from two  
18 rounds of the Vietnam Global School-based Student Health Survey (GSHS) that is the  
19 nationally representative survey conducted in 2013 and 2019. The logistic regressions were  
20 carried out to identify factors associated with tobacco smoking among study participants. We  
21 found the prevalence of current smoking (water pipe and cigarettes) reduced significantly from  
22 5.4% (95% CI: 4.0–7.2) in 2013 to 2.8% (95% CI: 2.2–3.6) in 2019. In 2019, 2.6% of students  
23 used electronic cigarette products in the last 30 days. Factors associated with higher odds of  
24 current smoking status included study year, gender, parental monitoring, loneliness, suicide  
25 attempt, sexual intercourse, truancy, alcohol drinking. Similar patterns were found in e-  
26 cigarette use. Smoking among adolescents in Vietnam reduced between 2013 and 2019. Further  
27 follow-up studies are needed to confirm the causal factors of the reduction and e-cigarettes use.  
28

## 29 **Introduction**

30 Tobacco smoking is one among the most dangerous risk behaviors, leading to many adverse  
31 human health consequences, such as cancers, cardiovascular diseases, chronic pulmonary  
32 diseases and many other types of health problems [1, 2]. Tobacco smoking is related to more  
33 than 8 million cases of death annually and this figure will continue to increase in the coming  
34 time [1]. Around 80% of 1.3 billion smokers are living in lower-middle income countries  
35 (LMIC), where tobacco-related burden of disease is the most severe [2].

36 Compelling research evidence showed that the age of first tobacco smoking is in the trend of  
37 decreasing [3-5]. More than 50% of current smokers start to smoke since adolescent [2, 6]. In  
38 fact, according to the Global Youth Tobacco Survey conducted in 61 countries between 2012  
39 and 2015, the median proportion of current smokers among students aged 13-15 years old was  
40 10.7% [7, 8]. Adolescent smoking before 18 year old tends to form a habit and should be harder  
41 to quit than the others [9].

42 Vietnam is one of the 15 countries with highest proportion of male smokers in the world. The  
43 prevalence of current smoking among adults aged 15 years old in Vietnam in 2015 was 22.5%  
44 (45.3% among men, 1.1% among women) [10]. Approximately 75,000 people dying each  
45 year due to complications caused by smoking [11]. In 2011, the total economic cost related  
46 to smoking was around US\$ 1.2 billion, equivalent to 5.76% of the national healthcare budget  
47 [12]. Although the prevalence of smoking among adolescents in Vietnam seems to be still not  
48 high, i.e. 3.5% (6.3% among boys and 0.9%) in 2014 among the children aged 13-15 years old  
49 [13], the issues of youth smoking in Vietnam should not be underestimated because tobacco  
50 companies are trying to expand cigarette markets by promoting cigarettes to adolescents [9].  
51 Also, youth smokers are three times more likely than non-smokers to use alcohol, eight times  
52 more likely to use marijuana, and 22 times more likely to use cocaine. Smoking is associated  
53 with a host of other risky behaviors, such as fighting and engaging in unprotected sex [9].

54 In 2001, to support the tobacco prevention and control efforts, WHO in collaboration with  
55 UNAIDS, UNESCO, UNICEF, and with technical assistance from the U.S. CDC initiated the  
56 development of the Global School-based Student Health Survey (GSHS). GSHS is a  
57 collaborative surveillance project designed to help countries measure and assess the behavioral  
58 risk factors and protective factors in 10 key areas among young people aged 13 to 17 years.  
59 The GSHS is a relatively low-cost school-based survey, which uses a self-administered  
60 questionnaire to obtain data on young people's health behavior and protective factors related to  
61 the leading causes of morbidity and mortality among children and adults worldwide [14]. In  
62 Vietnam, the GSHS was conducted in 2013 and 2019 to provide data on health behaviors and  
63 protective factors among students. aiming to help developing priorities, establish programs,  
64 and advocate for resources for school health and youth health programs and policies [15, 16].  
65 In this paper, using the data from the Vietnam GSHS 2013 and 2019, we aim to describe the  
66 prevalence of tobacco smoking and associated factors among students aged 13-17 years.

67

## 68 **Methods**

### 69 **Data source**

70 The Vietnam GSHS 2013 and 2019 used the standardized protocol of WHO with technical  
71 support from the US CDC, which was designed to collect data from students in developing  
72 countries [17]. The Vietnam GSHS employed a two-stage cluster sampling design to produce  
73 a nationally representative sample of school students aged 13-17. In the first stage, schools  
74 were selected based on a probability proportional to enrolment size. In the second stage, in  
75 each selected school, classes were chosen using the simple random sampling technique. The  
76 final sample for GSHS 2013 was 3331 students from 13 cities/provinces (response rate was  
77 96.0%), while the sample size for GSHS 2019 was 7796 students from 20 cities/provinces  
78 (response rate was 93.5%).

79 **Questionnaire development**

80 In the Vietnam GSHS 2013 survey, the GSHS standardized questionnaire in English [17] was  
81 translated into Vietnamese using the forward and backward translation. The 2013 translated  
82 questionnaire was pilot tested with 50 students before official use. In the GSHS 2019, we used  
83 the 2013 version with some updates as per the 2019 original English version. We also used  
84 relevant indicators from the 25 Global Non-Communicable Diseases and Healthy Vietnam [18]  
85 to adapt into the Vietnam GSHS 2019 questionnaire. The 2019 questionnaire was pilot tested  
86 with 120 students aged 13–17 years for the comprehension of questions, the appropriateness  
87 of language, and checking for any logical issues. The pilot data were reviewed by senior  
88 researchers to suggest modifications to the translation to improve clarity.

89

90 **Data collection**

91 In each selected class, a homeroom teacher supported us to explain to students about the study.  
92 We provided information about the Vietnam GSHS and consent forms for the students and  
93 requested them to share these documents with parents for signing as an agreement to participate  
94 in the study. The following day, we administered GSHS questionnaire among students who  
95 had consent from their parents and were willing to participate in the study. Data collectors, who  
96 were medical or public health students, were trained on both GSHS questionnaire and data  
97 collection procedure, took main responsibilities for the data collection process. Students  
98 answered the self-administered questionnaire on separate, computer scanable answer sheets,  
99 during one classroom period. All the procedure of data collection was following WHO's  
100 guidance and templates.

101

102 **Measurements**

103 In this paper, the dependent variable was current smoking status (smoking in the past 30 days).  
104 The independent variables included demographic characteristics, including gender  
105 (male/female) and age (from 13 to 17); parental factors, including parental monitoring (parents  
106 most of the time/always checked homework or know what their children do in their free time  
107 – yes/no), parental understanding (parents most of the time/always understood  
108 problems/worries or gave advice/guidance – yes/no), and parental respect (parents most of the  
109 time/always respect their children or their personal space – yes/no); have close friend (students  
110 who had any close friends – yes/no); mental health, including loneliness (students who most of  
111 the time/always felt lonely during the past 12 months – yes/no) and suicide attempt (students  
112 who seriously considered attempting suicide in the past 12 months – yes/no); violence (students  
113 who were physically attacked in the past 12 months – yes/no); bullying (students who were  
114 bullied at school in the past 30 days – yes/no); sexual intercourse (students who have ever had  
115 sexual intercourse – yes/no); truancy (students who missed any days without permission during  
116 the past 30 days – yes/no); risk behaviors, including drinking alcohol (students who drank at  
117 least 1 drink in the past 30 days – yes/no), sedentary behaviors (student who spent three or  
118 more hours a day to do these activities – yes/no), and low fruit/vegetable intake (students who  
119 ate less than 5 time fruits/vegetables per day in the past 30 days – yes/no). We also assessed  
120 the smoking environment of students defined as students who had seen/contacted with smokers  
121 in the past 7 days (yes/no). The questions used to identify smoking status and other  
122 classification of statuses are described in **Table1**.

123 **(Insert Table 1 here)**

#### 124 **Data processing and analysis**

125 Data entry was conducted using a scanning device and then transformed into the data frame  
126 using Stata software. The data set collected were cleaned and edited for inconsistencies,  
127 following the guideline for data users published at the CDC website. A weighting factor was

128 applied to each student record to reflect the likelihood of sampling each student and to reduce  
129 bias by compensating for different patterns of nonresponse. The weight used for estimation  
130 was given by.

$$131 \quad W = W1 * W2 * W3 * f1 * f2 * f3$$

132 In which:

133 W1 is the inverse of the probability of selecting the province

134 W2 is the inverse of the probability of selecting the school

135 W3 is the inverse of the probability of selecting the classroom within the school

136 f1 is a school level nonresponse adjustment factor calculated by school.

137 f2 is a student level nonresponse adjustment factor calculated by class size category. The factor  
138 was calculated in terms of class enrolment instead of number of classes.

139 f3 is a post-stratification adjustment factor calculated by rural/urban and grade.

140 In GHSH 2019, among 7796 students, 106 self-identified as other-gender. Due to the small  
141 sample size of the other-gender group, and to be consistent with GSHS 2013, we included male  
142 and female students (n = 7690) in the analysis. Logistic regressions were used to identify  
143 factors related to current cigarettes and e-cigarettes smoking. All analyses were conducted  
144 using Stata v16 with survey package “svy” to take into account the complex sample design  
145 (strata, cluster and weights).

146

#### 147 **Consent and ethical consideration**

148 This survey was approved by the Ethics Committee of Hanoi University of Public Health (IRB  
149 No 421/2019/YTCC-HD3 dated 06<sup>th</sup> August 2019). The study also received supports from  
150 Ministry of Health, Ministry of Education and Training, Provincial Department of Education  
151 and Training, and selected schools. All students participating in this survey were explained the  
152 objectives of the study. Survey procedures were designed to protect student privacy by

153 allowing for anonymous and voluntary participation. Specifically, their participations were  
154 completely voluntary, which was clearly indicated in the Consent Form for Participation in the  
155 Research. The students had the right to withdraw from the study or refuse to answer any  
156 specific questions in the questionnaire without any consequences. All personal information of  
157 school students was kept confidential, and all information was encrypted.

158

## 159 **Results**

### 160 *Characteristics of the study students*

161 The characteristics of the study students are presented in **Table 2**. The patterns of parental  
162 monitoring, having close friends, reporting loneliness, suicide attempt, sexual intercourse and  
163 sedentary behaviors were quite similar in both study years. The percentages of students who  
164 reported having parental understanding parental respect were higher in the GSHS 2019. The  
165 proportions of student who experienced violence, bully, truancy and drinking alcohol in the  
166 past 30 days were lower in GSHS 2019.

167 **(Insert Table 2 here)**

### 168 *Pattern of current tobacco smoking among the study students*

169 As shown in **Table 3**, the prevalence of current tobacco smoking (both water pipe and  
170 cigarettes) among the study students in 2013 and 2019 were 5.4% (95% CI: 4.0–7.2) and 2.8%  
171 (95% CI: 2.2–3.6). The difference was statistically significant. Significant decreases in the  
172 prevalence of smoking among the study students from 2013 to 2019 were found for both  
173 cigarette smoking and water pipe. In 2019, 2.6% of students reported that they used electronic  
174 cigarette products in the last 30 days.

175 **(Insert Table 3 here)**



176 The prevalence of current traditional tobacco smoking and e-cigarettes smoking (and 95% CI)  
177 among the study students by their characteristics (among all study students and the male  
178 students) are shown in **Supplemental Table 1** and **Supplemental Table 2**.

179

#### 180 *Factors associated with traditional tobacco smoking among the study students*

181 **Table 4** shows the results of logistic regression analyses of factors associated with traditional  
182 tobacco smoking status among the study students. Among all students, after controlling for  
183 other independent variables in the model, the statistically significant factors associated with  
184 current smoking status were: 1) study year: lower in 2019 (OR = 0.66); 2) gender: higher among  
185 male student (OR = 4.20); 3) parental monitoring: lower in the group with high level of parental  
186 monitoring (OR = 0.57); 4) loneliness: higher among those who felt loneliness (OR = 1.57); 5)  
187 suicide attempt: higher among those who had suicide attempt (OR = 1.71); 6) sexual  
188 intercourse: higher among those who had sexual intercourse (OR = 4.56); 7) truancy: higher  
189 among those who reported truancy (OR = 2.23); 8) alcohol drinking: higher among those who  
190 drank alcohol in the past 30 days (OR = 4.17). Among male students, after controlling for other  
191 independent variables in the model, statistically significant association was found with age,  
192 with higher odds of tobacco smoking among older students (OR = 2.0-2.3). All associated  
193 factors found in the model for all students remained significant in the model for males,  
194 excepting for study year, loneliness, and suicide attempt.

195

**(Insert Table 4 here)**

#### 196 *Factors associated with e- cigarettes smoking among the study students*

197 Factors associated with e-cigarette use among students in 2019 are presented in **Table 5**. We  
198 found that being male, attempting suicide in the past 12 months, having sexual intercourse,  
199 being bullied, truancy, drinking alcohol, and spending three or more hours on sedentary  
200 behaviors were significant factors increasing the odds of using e-cigarettes among students.

201 Especially, students who reported drinking alcohol in the past 30 days were five times more  
202 likely to be an e-cigarette user (OR = 5.38, 95% CI: 3.75-7.71). However, having high parental  
203 monitoring and respect decreased the odds of being e-cigarette users by 44% and 36% among  
204 students, respectively. All these associated factors remained significant in the regression model  
205 for male students, excepting parental respect, and truancy. Age, parental understanding,  
206 loneliness, violence suffering, and fruit/vegetable intake were found to be not significantly  
207 associated with e-cigarette use among students.

208 **(Insert Table 5 here)**

## 209 **Discussion**

210 Tobacco smoking is one of the most dangerous risk behaviors. In this study, we used the data  
211 from the Vietnam GSHS 2013 and 2019 to describe the prevalence of tobacco smoking and  
212 associated factors among school students aged 13-17 years old. We found that the prevalence  
213 of traditional tobacco smoking decreased significantly from 2013 to 2019. The prevalence of  
214 students using e-cigarettes in the last 30 days was 2.6% in 2019. Factors associated with higher  
215 odds of traditional smoking included gender, mental health problems, sexual intercourse,  
216 truancy, and alcohol consumption. Risk factors of e-cigarettes smoking included gender,  
217 mental health problems, bullying, sexual intercourse, truancy, alcohol consumption, and  
218 sedentary behaviors. In contrast, the protective factor for traditional smoking was parental  
219 monitoring; for e-cigarettes smoking were parental monitoring and parental respect.

220 We found a significant decrease in the prevalence of traditional tobacco smoking among the  
221 students aged 13-17 years old in Vietnam from 2013 to 2019. This tendency can be explained  
222 by positive and effective activities of Vietnam steering committee on smoking and health and  
223 other partner organizations. The communicating and educating activities about tobacco harms  
224 were performed with many methods which was attracted attention and increasing knowledge  
225 of community. The Global Adult Tobacco Use Survey (GATS 2015) in Vietnam also indicated

226 a decreasing trend in adult smoking rates, from 23.8% in 2010 to 22.5% in 2015 [19]. In the  
227 literature, the prevalence of tobacco smoking varies across countries and the time surveyed.  
228 According to a multi-country analysis of tobacco use among adolescents aged 13-15 years old  
229 (data of GSHS from 44 countries, 110 sites) [20], the overall prevalence of tobacco use ranged  
230 from 0.9% in Tajikistan (2006) to 32.8% in Chile (2005). In South-East Asia region, the  
231 prevalence of cigarette smoking ranged from 1.2% in India (2007) to 11.7% in Indonesia  
232 (2007). Within the Western Pacific region, the prevalence of tobacco use ranged from 3.5% in  
233 China (2003) to 12.3% in Philippines, Luzon (2003) [20].

234 Regarding the trend of tobacco use among the adolescents, several studies have also shown the  
235 declining trend. Study of Choi et al. using data from the Health and Nutrition Examination  
236 Survey from 1998 to 2013 and the Korea Youth Risk Behavior Web-based Survey from 2005  
237 to 2013 indicated a clear decline trend among girls [21]. The global report on the trends of  
238 tobacco use from 2000 and projected to 2025 showed that the smoking prevalence among  
239 people aged 15 to 25 years will decrease from 22.6% in 2010 to 14.2% in 2025 [22].

240 In line with previous studies, our study confirmed that the risk factors of tobacco smoking  
241 included male gender [21, 23, 24], mental health problems [25, 26], having sexual intercourse  
242 [27], truancy [28, 29], and alcohol consumption [23, 24, 28].

243 The prevalence of e-cigarette use among youth widely varies across countries. For example,  
244 the prevalence of daily use of e-cigarette among New Zealander youth aged 14-15 in 2019 was  
245 3.1% [30], 4.4% of adolescents aged 15-17 years in Taiwan reported ever having used e-  
246 cigarettes in 2015 [31], and very high in the US with 27.5% of high school students and 10.5%  
247 of middle school students reported current e-cigarette use (in the past 30 days) in 2019 [32]. In  
248 addition, the prevalence of e-cigarette use in youth increased rapidly over a short period of time  
249 in some countries [33]. Current e-cigarette use among US high school students, for instance,  
250 rose from 1.5% to 16% during the 2011-2015 period [34] before reaching the current level. The

251 prevalence of e-cigarette uses among Vietnamese students in our study (2.6%) seemed to be  
252 lower than the above-mentioned countries. This can be explained that currently e-cigarettes are  
253 not allowed to be imported to Viet Nam, all the e-cigarette products in the markets are  
254 illegal/smuggled products.

255 Most e-cigarettes contain nicotine that can lead to respiratory ailments, negative impacts on  
256 attention, learning, and memory among adolescents and young adults, while long-term health  
257 effects of e-cigarette use remain unknown [35-37]. Moreover, some evidence indicates that e-  
258 cigarette use in adolescents can be a gateway to the initiation of drugs and other tobacco  
259 products use [37, 38], thereby causing more harmful effects. The design of e-cigarette devices  
260 and its variety of liquid solutions flavors (i.e., menthol, fruit, coffee, candy, etc.) that hide the  
261 harsh taste of nicotine can be an appeal to adolescents. Another concern is that many  
262 adolescents and young adults may perceive that vaping is cool, socially acceptable, or no  
263 harmful effects [39, 40], and adolescents are susceptible to peer influences, which can make e-  
264 cigarette use quickly become popular among adolescents. Therefore, despite the low  
265 prevalence of e-cigarette smoking in adolescents in Vietnam, it should be given adequate  
266 attention from experts working on tobacco control. Also, we found that e-cigarette use was  
267 associated with other unhealthy behaviors among Vietnamese students, such as alcohol  
268 drinking, sexual intercourse, truancy, and sedentary behaviors, suggesting that health education  
269 programs for adolescents should comprehensively target on this compound risk factors rather  
270 than individual factor. However, longitudinal studies are needed to determine causal factors  
271 associated with e-cigarette use among Vietnamese adolescents.

272 It is noticed that a high level of parental monitoring was associated with lower odds of smoking  
273 among the students. Vietnam is a country with a traditional family-oriented culture, parental  
274 factors always play a crucial role in children's behaviors. Some studies have also shown the  
275 protective effects of parental factors on children's behaviors, including smoking status.

276 Castrucci's research about the association between parenting style and US adolescent smoking  
277 indicated that parenting style was associated with a 26% reduction in adolescent smoking [32].  
278 A study in Cook Islands, Curacao, and East Timor also found that parental monitoring, which  
279 was measured in four aspects: understanding, knowing free time activities of children, (went  
280 over things without permission, and checking homework), related to the lower odds of smoking  
281 of adolescents aged 13 to 17 years old [41]. Together the results highlighted the need to  
282 incorporate parental involvement in programs that are designed to reduce tobacco smoking  
283 among adolescents.

#### 284 ***Limitations***

285 There are several limitations of this study. First, despite a national representative school-based  
286 sampling frame, results from this study cannot be generalized to all Vietnamese adolescent as  
287 those who were not attending schools were not included in this study. In addition, due to the  
288 cross-sectional design, we were unable to determine causal factors of a decreased trend in  
289 cigarette smoking as well as the emerging of e-cigarette use among Vietnamese students.  
290 Third, data were self-reported and might be subject to recall and response bias.

291

## 292 **References**

- 293 1. World Health Organization Tobacco 2020 [Available from:  
294 <https://www.who.int/news-room/fact-sheets/detail/tobacco>.
- 295 2. World Health Organization. Noncommunicable diseases 2020 [Available from:  
296 <https://www.who.int/news-room/fact-sheets/detail/noncommunicable-diseases>.
- 297 3. Bilgiç N, Günay T. Evaluation of effectiveness of peer education on smoking behavior  
298 among high school students. *Saudi Med J*. 2018;39(1):74-80.
- 299 4. Vasilopoulos A, Gourgoulianis K, Hatzoglou C, Roupa Z. Juvenile (age 13-18)  
300 smoking incidence determinants in Greece. *International journal of nursing practice*. 2014;21.
- 301 5. Wang M, Zhong J-M, Fang L, Wang H. Prevalence and associated factors of smoking  
302 in middle and high school students: a school-based cross-sectional study in Zhejiang Province,  
303 China. *BMJ Open*. 2016;6(1):e010379.
- 304 6. Sarmiento D, Yehadji D. An analysis of global youth tobacco survey for developing a  
305 comprehensive national smoking policy in Timor-Leste. *BMC Public Health*. 2015;16.
- 306 7. Karadoğan D, Önal Ö, Kanbay Y. Prevalence and determinants of smoking status  
307 among university students: Artvin Çoruh University sample. *PLoS One*.  
308 2018;13(12):e0200671-e.
- 309 8. Arrazola RA, Ahluwalia IB, Pun E, Garcia de Quevedo I, Babb S, Armour BS. Current  
310 Tobacco Smoking and Desire to Quit Smoking Among Students Aged 13-15 Years - Global  
311 Youth Tobacco Survey, 61 Countries, 2012-2015. *MMWR Morbidity and mortality weekly*  
312 *report*. 2017;66(20):533-7.
- 313 9. National Center for Chronic Disease Prevention and Health Promotion. Preventing  
314 Tobacco Use Among Youth and Young Adults: A Report of the Surgeon General. Atlanta:  
315 CDC; 2012.
- 316 10. Vietnam Ministry of Health. Vietnam Global Adults Tobacco Use Survey 2015. 2016.

- 317 11. Tobacco Free Kids. Vietnam Factsheet on tobacco burden 2015. 2016.
- 318 12. Hoang Anh PT, Thu LT, Ross H, Quynh Anh N, Linh BN, Minh NT. Direct and indirect  
319 costs of smoking in Vietnam. *Tobacco Control*. 2016;25(1):96.
- 320 13. Huong le T, Vu NT, Dung NN, Xuan le TT, Giang KB, Hai PT, et al. Cigarette Smoking  
321 among Adolescents aged 13-15 in Viet Nam and Correlates of Current Cigarette Smoking:  
322 Results from GYTS 2014 Data. *Asian Pacific journal of cancer prevention : APJCP*.  
323 2016;17(S1):17-23.
- 324 14. World Health Organization. Global school-based student health survey (GSHS)  
325 implementation: World Health Organization; 2019 [Available from:  
326 <https://www.who.int/ncds/surveillance/gshs/country/en/>].
- 327 15. Centers for Disease Control and Prevention, World Health Organization. Vietnam  
328 Global School-Based Student Health Survey 2012-2013. Geneva, Switzerland: World Health  
329 Organization (WHO); 2013.
- 330 16. Centers for Disease Control and Prevention. Global Youth Tobacco Survey (GYTS)  
331 2007. Atlanta: Centers for Disease Control and Prevention; 2007.
- 332 17. US Centers for Disease Control and Prevention. Global School-based Student Health  
333 Survey (GSHS) [12 July 2020]. Available from: <https://www.cdc.gov/gshs/index.htm>.
- 334 18. World Health Organization. Noncommunicable Diseases Global Monitoring  
335 Framework [cited 2020 12 July 2020]. Available from:  
336 [https://www.who.int/nmh/global\\_monitoring\\_framework/en/](https://www.who.int/nmh/global_monitoring_framework/en/).
- 337 19. GATS Vietnam. Global Adult Tobacco Survey (GATS) Viet Nam 2015. 2016.
- 338 20. Page RM, Danielson M. Multi-country, cross-national comparison of youth tobacco  
339 use: Findings from Global School-based Health Surveys. *Addictive Behaviors*.  
340 2011;36(5):470-8.

- 341 21. Choi S, Park S, Jihye L, Kim Y, Oh K. Trends in cigarette smoking among adolescents  
342 and adults in South Korea. *Epidemiology and health*. 2014;36.
- 343 22. World Health Organization. WHO global report on trends in prevalence of tobacco use  
344 2000-2025, third edition. 2019.
- 345 23. Algorinees R, Alreshidi I, Alateeq M, Alghuraymi A, Alfayez A, Almuzaini F, et al.  
346 Prevalence of Cigarette Smoking Usage among Adolescent Students in Northern Saudi Arabia.  
347 *Asian Pacific journal of cancer prevention : APJCP*. 2016;17:3837-41.
- 348 24. Duc DM, Vui LT, Son HN, Minh HV. Smoking Initiation and Cessation among Youths  
349 in Vietnam: A Longitudinal Study Using the Chi Linh Demographic-Epidemiological  
350 Surveillance System (CHILILAB DESS). *AIMS Public Health*. 2016;4(1):1-18.
- 351 25. Hockenberry JM, Timmons EJ, Weg MWV. Adolescent mental health as a risk factor  
352 for adolescent smoking onset. *Adolesc Health Med Ther*. 2011;2:27-35.
- 353 26. Weiss JW, Spruijt-Metz D, Palmer PH, Chou C-P, Johnson CA. Smoking among  
354 Adolescents in China: An Analysis Based upon the Meanings of Smoking Theory. *American*  
355 *Journal of Health Promotion*. 2006;20(3):171-8.
- 356 27. Tyas SL, Pederson LL. Psychosocial factors related to adolescent smoking: a critical  
357 review of the literature. *Tobacco Control*. 1998;7(4):409.
- 358 28. Mat Hassan N, Abdul Aziz A, Husain R, Daud N, Juhari SN. Association of prosocial  
359 behavior with ever smoking and alcohol drinking among school-going adolescents. *Heliyon*.  
360 2020;6(7).
- 361 29. Perelman J, Leão T, Kunst AE. Smoking and school absenteeism among 15- to 16-year-  
362 old adolescents: a cross-section analysis on 36 European countries. *Eur J Public Health*.  
363 2019;29(4):778-84.



- 364 30. Walker N, Parag V, Wong SF, Youdan B, Broughton B, Bullen C, et al. Use of e-  
365 cigarettes and smoked tobacco in youth aged 14-15 years in New Zealand: findings from  
366 repeated cross-sectional studies (2014-19). *The Lancet Public health*. 2020;5(4):e204-e12.
- 367 31. Chang H-C, Tsai Y-W, Shiu M-N, Wang Y-T, Chang P-Y. Elucidating challenges that  
368 electronic cigarettes pose to tobacco control in Asia: a population-based national survey in  
369 Taiwan. *BMJ open*. 2017;7(3):e014263-e.
- 370 32. Cullen KA, Gentzke AS, Sawdey MD, Chang JT, Anic GM, Wang TW, et al. e-  
371 Cigarette Use Among Youth in the United States, 2019. *JAMA*. 2019;322(21):2095-103.
- 372 33. Hammond D, Reid JL, Rynard VL, Fong GT, Cummings KM, McNeill A, et al.  
373 Prevalence of vaping and smoking among adolescents in Canada, England, and the United  
374 States: repeat national cross sectional surveys. *BMJ (Clinical research ed)*. 2019;365:l2219.
- 375 34. Wang TW, Gentzke A, Sharapova S, Cullen KA, Ambrose BK, Jamal A. Tobacco  
376 Product Use Among Middle and High School Students - United States, 2011-2017. *MMWR*  
377 *Morbidity and mortality weekly report*. 2018;67(22):629-33.
- 378 35. Abreu-Villaça Y, Seidler FJ, Tate CA, Slotkin TA. Nicotine is a neurotoxin in the  
379 adolescent brain: critical periods, patterns of exposure, regional selectivity, and dose thresholds  
380 for macromolecular alterations. *Brain research*. 2003;979(1-2):114-28.
- 381 36. Schochet TL, Kelley AE, Landry CF. Differential expression of arc mRNA and other  
382 plasticity-related genes induced by nicotine in adolescent rat forebrain. *Neuroscience*.  
383 2005;135(1):285-97.
- 384 37. Office of the Surgeon General. E-cigarette Use among Youth and Young Adults: A  
385 Report of the Surgeon General. Washington, DC: U.S. Department of Health and Human  
386 Services, Centers for Disease Control and Prevention; 2016.
- 387 38. Barrington-Trimis JL, Urman R, Berhane K, Unger JB, Cruz TB, Pentz MA, et al. E-  
388 Cigarettes and Future Cigarette Use. *Pediatrics*. 2016;138(1).

- 389 39. Sanders-Jackson AN, Tan AS, Bigman CA, Henriksen L. Knowledge About E-  
390 Cigarette Constituents and Regulation: Results From a National Survey of U.S. Young Adults.  
391 *Nicotine & tobacco research : official journal of the Society for Research on Nicotine and*  
392 *Tobacco*. 2015;17(10):1247-54.
- 393 40. Choi K, Fabian L, Mottey N, Corbett A, Forster J. Young adults' favorable perceptions  
394 of snus, dissolvable tobacco products, and electronic cigarettes: findings from a focus group  
395 study. *American journal of public health*. 2012;102(11):2088-93.
- 396 41. Shaikh MA, Zare Z, Ng KW, Celedonia KL, Lowery Wilson M. Tobacco Use and  
397 Parental Monitoring—Observations from Three Diverse Island Nations—Cook Islands,  
398 Curaçao, and East Timor. *International Journal of Environmental Research and Public Health*.  
399 2020;17(20).
- 400
- 401

402 **Table 1: Definitions of dependent and independent variables analysed**

| Variables                    | Question                                                                                                                                                                                                                                                                                                                                                          | Definition used in this paper                                                                                                       |
|------------------------------|-------------------------------------------------------------------------------------------------------------------------------------------------------------------------------------------------------------------------------------------------------------------------------------------------------------------------------------------------------------------|-------------------------------------------------------------------------------------------------------------------------------------|
| <b>Dependent variables</b>   |                                                                                                                                                                                                                                                                                                                                                                   |                                                                                                                                     |
| Smoked traditional tobacco   | - During the past 30 days, on how many days did you smoke cigarettes?<br>- During the past 30 days, on how many days did you use “thuoc lao” (Vietnamese water pipe)?<br>1 “0 days” to 7 “All 30 days”                                                                                                                                                            | Students who smoked at least 1 time (cigarettes or Vietnamese water pipe) in the past 30 days<br>(Yes vs. No)                       |
| Smoked e-cigarettes          | During past 30 days, on how many days did you use electronic cigarettes?<br>1 “0 days” to 7 “All 30 days”                                                                                                                                                                                                                                                         | Students who smoked e-cigarettes at least 1 time in the past 30 days<br>(Yes vs. No)                                                |
| <b>Independent variables</b> |                                                                                                                                                                                                                                                                                                                                                                   |                                                                                                                                     |
| Gender                       |                                                                                                                                                                                                                                                                                                                                                                   | Male vs. Female                                                                                                                     |
| Age                          | How old are you?<br>1 “13 year-old” to 5 “17 year-old or older”                                                                                                                                                                                                                                                                                                   | From 13 to 17                                                                                                                       |
| Parental monitoring          | - During the past 30 days, how often did your parents or guardians check to see if your homework was done?<br>- During the past 30 days, how often did your parents or guardians really know what you were doing with your free time?<br>1 “Never”; 2 “Rarely”; 3 “Sometimes”; 4 “Most of the time”; 5 “Always”                                                   | Students whose parents most of the time/always checked homework or know what their children do in their free time<br>(High vs. Low) |
| Parental understanding       | - During the past 30 days, how often did your parents or guardians understand your problems and worries?<br>- During the past 30 days, how often did your parents or guardians give you advice and guidance?<br>1 “Never”; 2 “Rarely”; 3 “Sometimes”; 4 “Most of the time”; 5 “Always”                                                                            | Students whose parents most of the time/always understood problems/worries or gave advice/guidance<br>(High vs. Low)                |
| Parental respect             | - During the past 30 days, how often did your parents or guardians go through your things without your approval?<br>- During the past 30 days, how often did your parents or guardians not respect you as a person (for example, not let you talk or favor someone else more than you)?<br>1 “Never”; 2 “Rarely”; 3 “Sometimes”; 4 “Most of the time”; 5 “Always” | Students whose parents most of the time/always respect their children or their personal space (reverse scale)<br>(Yes vs. No)       |
| Have close friends           | How many close friends do you have?<br>1 “0” to 3 “3 or more”                                                                                                                                                                                                                                                                                                     | Students who had any close friends<br>(Yes vs. No)                                                                                  |
| Loneliness                   | During the past 12 months, how often have you felt lonely?<br>1 “Never”; 2 “Rarely”; 3 “Sometimes”; 4 “Most of the time”; 5 “Always”                                                                                                                                                                                                                              | Students who most of the time/always felt lonely during the past 12 months<br>(Yes vs. No)                                          |
| Suicide attempt              | During the past 12 months, did you ever seriously consider attempting suicide?<br>1 “No”; 2 “Yes”                                                                                                                                                                                                                                                                 | Students who seriously considered attempting suicide in the past 12 months<br>(Yes vs. No)                                          |
| Violence                     | During the past 12 months, how many times were you physically attacked?<br>1 “0 time”; 2 “1 time” to 8 “12 or more time”                                                                                                                                                                                                                                          | Students who were physically attacked in the past 12 months<br>(Yes vs. No)                                                         |
| Bullied                      | During the past 30 days, on how many days were you bullied at school (or near school or on the way to and from school)?<br>1 “0 day” to 7 “all 30 days”                                                                                                                                                                                                           | Students who were bullied at school in the past 30 days<br>(Yes vs. No)                                                             |
| Sexual intercourse           | Have you ever had sexual intercourse?<br>0 “No”; 1 “Yes”                                                                                                                                                                                                                                                                                                          | Students who have ever had sexual intercourse<br>(Yes vs. No)                                                                       |
| Truancy                      | During the past 30 days, on how many days did you miss classes or school without permission?<br>1 “0 day” to 5 “10 days or more”                                                                                                                                                                                                                                  | Students who missed any days without permission during the past 30 days                                                             |

| <b>Variables</b>                             | <b>Question</b>                                                                                                                                                                                                                                                                                                                                                                         | <b>Definition used in this paper</b>                                                            |
|----------------------------------------------|-----------------------------------------------------------------------------------------------------------------------------------------------------------------------------------------------------------------------------------------------------------------------------------------------------------------------------------------------------------------------------------------|-------------------------------------------------------------------------------------------------|
| Drinking alcohol                             | During the past 30 days, on how many days did you have at least one drink containing alcohol?<br>1 “0 days” to 7 “All 30 days”                                                                                                                                                                                                                                                          | (Yes vs. No)<br>Students who drank at least 1 drink in the past 30 days<br>(Yes vs. No)         |
| Sedentary behaviours                         | How much time do you spend during a typical or usual day sitting and watching television, playing computer games, relaxing with iPad, mobile phone, talking with friends, or doing other sitting activities, such as book reading or using Facebook?<br>1 “Less than 1 hour per day”; 2 “1 to 2 hours per day”; 3 “3 to 4 hours per day” to 6 “More than 8 hours per day”               | Student who spent three or more hours a day to do these activities<br>(Yes vs. No)              |
| Low fruit/vegetable intake                   | - During the past 30 days, on average how many times per day did you usually eat fruit, such as a banana, apple, orange, guava, rambutan, watermelon, papaya, or mango etc.?<br>- During the past 30 days, on average how many times per day did you usually eat vegetables, such as morning glory, cabbage, or mustard green etc.?<br>1 “I did not eat” to 7 “5 or more times per day” | Students who ate less than 5-time fruits/vegetables per day in the past 30 days<br>(Yes vs. No) |
| People smoked in presence in the past 7 days | During the past 7 days, on how many days have people smoked in your presence (at least one time per day)?<br>1 “0 days” to 5 “All 7 days”                                                                                                                                                                                                                                               | Students who had seen/contacted with smokers in the past 7 days<br>(Yes vs. No)                 |
| Smoked Shisha in the past 30 days            | During the past 30 days, on how many days did you use Shisha?<br>1 “0 days” to 7 “All 30 days”                                                                                                                                                                                                                                                                                          | Students who smoked shisha at least 1 time in the past 30 days<br>(Yes vs. No)                  |

403

404

405 **Table 2: Participants' characteristics**

| Characteristics                             | 2013        |            | 2019        |            |
|---------------------------------------------|-------------|------------|-------------|------------|
|                                             | n           | Weighted % | n           | Weighted % |
| <b>N</b>                                    | <b>3331</b> |            | <b>7690</b> |            |
| <b>Gender</b>                               |             |            |             |            |
| Male                                        | 1,557       | 46.9       | 3,572       | 46.0       |
| Female                                      | 1,765       | 53.1       | 4,118       | 54.0       |
| <b>Age</b>                                  |             |            |             |            |
| 13                                          | 897         | 21.7       | 1,024       | 16.7       |
| 14                                          | 858         | 22.5       | 1,523       | 30.4       |
| 15                                          | 542         | 19.6       | 1,672       | 19.9       |
| 16                                          | 769         | 23.9       | 1,646       | 15.9       |
| 17                                          | 264         | 12.3       | 1,825       | 17.1       |
| <b>Parental monitoring</b>                  |             |            |             |            |
| Low                                         | 1,664       | 52.2       | 4,252       | 52.3       |
| High                                        | 1,662       | 47.8       | 3,410       | 47.7       |
| <b>Parental understanding</b>               |             |            |             |            |
| Low                                         | 2,283       | 69.5       | 3,586       | 44.2       |
| High                                        | 1,038       | 30.5       | 4,102       | 55.8       |
| <b>Parental respect</b>                     |             |            |             |            |
| Low                                         | 1,209       | 36.8       | 1,176       | 14.3       |
| High                                        | 2,070       | 63.2       | 6,451       | 85.7       |
| <b>Have close friends</b>                   |             |            |             |            |
| No                                          | 173         | 5.5        | 778         | 8.8        |
| Yes                                         | 3,138       | 94.5       | 6,816       | 91.2       |
| <b>Loneliness</b>                           |             |            |             |            |
| No                                          | 2,910       | 88.5       | 6,589       | 87.7       |
| Yes                                         | 367         | 11.5       | 1,098       | 12.3       |
| <b>Suicide attempt</b>                      |             |            |             |            |
| No                                          | 2,750       | 83.1       | 6,333       | 84.6       |
| Yes                                         | 539         | 16.9       | 1,347       | 15.4       |
| <b>Violence</b>                             |             |            |             |            |
| No                                          | 2,582       | 79.0       | 6,885       | 89.6       |
| Yes                                         | 734         | 21.0       | 802         | 10.4       |
| <b>Bullied</b>                              |             |            |             |            |
| No                                          | 2,456       | 77.3       | 7,258       | 94.5       |
| Yes                                         | 744         | 22.7       | 427         | 5.5        |
| <b>Sexual intercourse</b>                   |             |            |             |            |
| No                                          | 3,002       | 93.5       | 7,188       | 94.9       |
| Yes                                         | 187         | 6.5        | 459         | 5.1        |
| <b>Truancy</b>                              |             |            |             |            |
| No                                          | 2,725       | 80.6       | 6,307       | 84.9       |
| Yes                                         | 598         | 19.4       | 1,191       | 15.1       |
| <b>Drinking alcohol in the past 30 days</b> |             |            |             |            |
| No                                          | 2,476       | 75.1       | 5,781       | 77.9       |
| Yes                                         | 722         | 24.9       | 1,864       | 22.1       |
| <b>Sedentary behaviors</b>                  |             |            |             |            |
| No                                          | 1,968       | 58.0       | 3,942       | 57.1       |
| Yes                                         | 1,349       | 42.0       | 3,683       | 42.9       |
| <b>Low fruit/vegetables intake</b>          |             |            |             |            |
| No                                          | 693         | 20.5       | 370         | 4.6        |
| Yes                                         | 2,603       | 79.5       | 7,295       | 95.4       |

406  
407  
408

409 **Table 3: Smoking prevalence and trend from 2013 to 2019**

410

| Characteristics                                                             | 2013 |           | 2019 |           |
|-----------------------------------------------------------------------------|------|-----------|------|-----------|
|                                                                             | %    | 95% CI    | %    | 95% CI    |
| Have ever smoked                                                            | 12.1 | 9.8–15.0  | 8.2  | 7.0–9.6   |
| Smoked cigarettes in the past 30 days                                       | 4.7  | 3.5–6.3   | 2.6  | 2.0–3.4   |
| Smoked water pipe in the past 30 days                                       | 2.4  | 1.5–3.8   | 1.0  | 0.7–1.4   |
| Traditional tobacco smoking (cigarettes and water pipe) in the past 30 days | 5.4  | 4.0–7.2   | 2.8  | 2.2–3.6   |
| People smoked in presence in the past 7 days                                | 75.8 | 73.4–78.0 | 66.0 | 63.8–68.2 |
| Smoked Shisha in the past 30 days                                           | n/a  | n/a       | 1.3  | 0.93–1.72 |
| Smoked e–cigarettes in the past 30 days                                     | n/a  | n/a       | 2.6  | 1.9–3.3   |

411

412 **Table 4: Factors related to traditional tobacco smoking among students aged 13–17 in**  
 413 **Vietnam**  
 414

| Factor                                                 | All students   |                  | Male students  |                  |
|--------------------------------------------------------|----------------|------------------|----------------|------------------|
|                                                        | OR             | 95% CI           | OR             | 95% CI           |
| <b>Year, (Ref: 2013)</b>                               |                |                  |                |                  |
| 2019                                                   | <b>0.66*</b>   | <b>0.44-0.99</b> | 0.63           | 0.39-1.00        |
| <b>Gender, (Ref: Female)</b>                           |                |                  |                |                  |
| Male                                                   | <b>4.25***</b> | <b>2.56-7.04</b> | --             | --               |
| <b>Age, (Ref: 13)</b>                                  |                |                  |                |                  |
| 14                                                     | 1.19           | 0.71-2.00        | 1.40           | 0.63-3.11        |
| 15                                                     | 1.27           | 0.85-1.92        | <b>2.00*</b>   | <b>1.16-3.44</b> |
| 16                                                     | 1.41           | 0.86-2.30        | <b>2.30**</b>  | <b>1.24-4.27</b> |
| 17                                                     | 1.45           | 0.93-2.25        | <b>2.30*</b>   | <b>1.18-4.48</b> |
| <b>Parental monitoring, (Ref: Low)</b>                 |                |                  |                |                  |
| High                                                   | <b>0.57*</b>   | <b>0.37-0.88</b> | <b>0.58*</b>   | <b>0.34-0.97</b> |
| <b>Parental understanding, (Ref: Low)</b>              |                |                  |                |                  |
| High                                                   | 0.90           | 0.63-1.30        | 0.97           | 0.62-1.51        |
| <b>Parental respect, (Ref: Low)</b>                    |                |                  |                |                  |
| High                                                   | 0.73           | 0.51-1.04        | 0.84           | 0.57-1.24        |
| <b>Have close friends, (Ref: No)</b>                   |                |                  |                |                  |
| Yes                                                    | 1.28           | 0.73-2.23        | 1.19           | 0.61-2.31        |
| <b>Loneliness, (Ref: No)</b>                           |                |                  |                |                  |
| Yes                                                    | <b>1.57*</b>   | <b>1.10-2.25</b> | 1.37           | 0.82-2.26        |
| <b>Suicide attempt, (Ref: No)</b>                      |                |                  |                |                  |
| Yes                                                    | <b>1.71*</b>   | <b>1.10-2.67</b> | 1.61           | 0.84-3.06        |
| <b>Violence, (Ref: No)</b>                             |                |                  |                |                  |
| Yes                                                    | 1.31           | 0.80-2.17        | 1.36           | 0.77-2.38        |
| <b>Bullied, (Ref: No)</b>                              |                |                  |                |                  |
| Yes                                                    | 0.82           | 0.50-1.33        | 0.89           | 0.50-1.59        |
| <b>Sexual intercourse, (Ref: No)</b>                   |                |                  |                |                  |
| Yes                                                    | <b>4.56***</b> | <b>3.17-6.57</b> | <b>4.57***</b> | <b>3.13-6.66</b> |
| <b>Truancy, (Ref: No)</b>                              |                |                  |                |                  |
| Yes                                                    | <b>2.23**</b>  | <b>1.38-3.61</b> | <b>2.31**</b>  | <b>1.29-4.14</b> |
| <b>Drinking alcohol in the past 30 days, (Ref: No)</b> |                |                  |                |                  |
| Yes                                                    | <b>4.17***</b> | <b>2.78-6.24</b> | <b>3.79***</b> | <b>2.31-6.22</b> |
| <b>Sedentary behaviors, (Ref: No)</b>                  |                |                  |                |                  |
| Yes                                                    | 0.98           | 0.71-1.36        | 0.86           | 0.61-1.22        |
| <b>Low fruit/vegetables intake, (Ref: No)</b>          |                |                  |                |                  |
| Yes                                                    | 1.11           | 0.73-1.67        | 1.28           | 0.71-2.31        |

415 \*  $p < 0.05$ ; \*\*  $p < 0.01$ ; \*\*\*  $p < 0.001$   
 416

417 **Table 5: Factors related to e-cigarettes smoking among students aged 13–17 in Vietnam**  
 418

| Factor                                                 | All students   |                  | Male students  |                  |
|--------------------------------------------------------|----------------|------------------|----------------|------------------|
|                                                        | OR             | 95% CI           | OR             | 95% CI           |
| <b>Gender, (Ref: Female)</b>                           |                |                  |                |                  |
| Male                                                   | <b>2.09**</b>  | <b>1.28-3.42</b> |                |                  |
| <b>Age, (Ref: 13)</b>                                  |                |                  |                |                  |
| 14                                                     | 0.56           | 0.22-1.44        | 0.57           | 0.19-1.72        |
| 15                                                     | 0.46           | 0.17-1.25        | 0.67           | 0.21-2.13        |
| 16                                                     | 0.42           | 0.14-1.23        | 0.56           | 0.18-1.73        |
| 17                                                     | 0.64           | 0.21-2.00        | 1.08           | 0.33-3.50        |
| <b>Parental monitoring, (Ref: Low)</b>                 |                |                  |                |                  |
| High                                                   | <b>0.56**</b>  | <b>0.40-0.78</b> | <b>0.54**</b>  | <b>0.35-0.84</b> |
| <b>Parental understanding, (Ref: Low)</b>              |                |                  |                |                  |
| High                                                   | 1.22           | 0.82-1.81        | 1.16           | 0.75-1.82        |
| <b>Parental respect, (Ref: Low)</b>                    |                |                  |                |                  |
| High                                                   | <b>0.64*</b>   | <b>0.43-0.97</b> | 0.67           | 0.36-1.24        |
| <b>Have close friends, (Ref: No)</b>                   |                |                  |                |                  |
| Yes                                                    | 1.20           | 0.68-2.12        | 1.08           | 0.48-2.40        |
| <b>Loneliness, (Ref: No)</b>                           |                |                  |                |                  |
| Yes                                                    | 1.08           | 0.70-1.68        | 0.93           | 0.48-1.83        |
| <b>Suicide attempt, (Ref: No)</b>                      |                |                  |                |                  |
| Yes                                                    | <b>1.75*</b>   | <b>1.08-2.83</b> | 1.49           | 0.83-2.68        |
| <b>Violence, (Ref: No)</b>                             |                |                  |                |                  |
| Yes                                                    | 1.20           | 0.55-2.59        | 1.06           | 0.48-2.34        |
| <b>Bullied, (Ref: No)</b>                              |                |                  |                |                  |
| Yes                                                    | <b>2.67**</b>  | <b>1.35-5.27</b> | <b>3.38**</b>  | <b>1.69-6.79</b> |
| <b>Sexual intercourse, (Ref: No)</b>                   |                |                  |                |                  |
| Yes                                                    | <b>3.05***</b> | <b>1.71-5.44</b> | <b>2.97**</b>  | <b>1.46-6.03</b> |
| <b>Truancy, (Ref: No)</b>                              |                |                  |                |                  |
| Yes                                                    | <b>1.68*</b>   | <b>1.11-2.54</b> | 1.01           | 0.64-1.59        |
| <b>Drinking alcohol in the past 30 days, (Ref: No)</b> |                |                  |                |                  |
| Yes                                                    | <b>5.38***</b> | <b>3.75-7.71</b> | <b>3.37***</b> | <b>2.27-5.00</b> |
| <b>Sedentary behaviors, (Ref: No)</b>                  |                |                  |                |                  |
| Yes                                                    | <b>1.81**</b>  | <b>1.25-2.60</b> | <b>1.54*</b>   | <b>1.05-2.27</b> |
| <b>Low fruit/vegetables intake, (Ref: No)</b>          |                |                  |                |                  |
| Yes                                                    | 0.66           | 0.30-1.47        | 1.01           | 0.33-3.08        |

419 \*  $p < 0.05$ ; \*\*  $p < 0.01$ ; \*\*\*  $p < 0.001$   
 420  
 421



422 **Supplemental Table 1: Prevalence of traditional tobacco smoking by students'**  
 423 **characteristics**

| Factor                                      | All students |           |      |          | Male students |           |      |           |
|---------------------------------------------|--------------|-----------|------|----------|---------------|-----------|------|-----------|
|                                             | 2013         |           | 2019 |          | 2013          |           | 2019 |           |
|                                             | %            | 95% CI    | %    | 95% CI   | %             | 95% CI    | %    | 95% CI    |
| <b>Gender</b>                               |              |           |      |          |               |           |      |           |
| Male                                        | 9.6          | 6.8–13.3  | 4.9  | 3.6–6.5  | --            | --        | --   | --        |
| Female                                      | 1.7          | 0.9–2.9   | 1.0  | 0.7–1.5  | --            | --        | --   | --        |
| <b>Age</b>                                  |              |           |      |          |               |           |      |           |
| 13                                          | 2.7          | 1.9–3.8   | 1.9  | 1.2–2.9  | 4.0           | 2.6-6.0   | 2.8  | 1.5-5.0   |
| 14                                          | 3.3          | 2.4–4.5   | 2.8  | 1.8–4.5  | 5.0           | 3.5-6.9   | 5.0  | 2.6-9.2   |
| 15                                          | 6.2          | 4.7–8.2   | 2.0  | 1.1–3.5  | 11.0          | 8.2-14.5  | 3.8  | 2.2-6.5   |
| 16                                          | 7.0          | 4.0–12.2  | 2.6  | 1.7–3.9  | 13.3          | 8.0-21.3  | 4.3  | 2.9-6.2   |
| 17                                          | 9.2          | 5.0–16.5  | 4.6  | 3.3–6.5  | 18.4          | 9.2-33.4  | 8.4  | 5.7-12.3  |
| <b>Parental monitoring</b>                  |              |           |      |          |               |           |      |           |
| Low                                         | 7.2          | 4.9–10.4  | 3.3  | 2.4–4.5  | 13.1          | 8.3-20.0  | 6.0  | 4.1-8.8   |
| High                                        | 3.3          | 2.3–4.9   | 2.1  | 1.4–3.2  | 6.1           | 4.1-9.1   | 3.6  | 2.5-5.3   |
| <b>Parental understanding</b>               |              |           |      |          |               |           |      |           |
| Low                                         | 5.9          | 4.1–8.3   | 3.1  | 2.3–4.3  | 10.6          | 7.1-15.5  | 5.1  | 3.3-7.8   |
| High                                        | 4.1          | 2.9–5.9   | 2.5  | 1.7–3.7  | 7.4           | 5.1-10.7  | 4.7  | 3.2-7.0   |
| <b>Parental respect</b>                     |              |           |      |          |               |           |      |           |
| Low                                         | 7.0          | 4.6–10.4  | 5.8  | 4.1-8.2  | 11.2          | 6.8-18.0  | 8.8  | 5.9-13.0  |
| High                                        | 4.2          | 3.0–5.8   | 2.2  | 1.6-3.0  | 8.0           | 5.7-11.2  | 4.1  | 2.8-5.8   |
| <b>Have close friends</b>                   |              |           |      |          |               |           |      |           |
| No                                          | 8.0          | 4.4–13.9  | 3.0  | 1.9–4.8  | 12.3          | 6.6-21.9  | 5.5  | 3.5-8.7   |
| Yes                                         | 5.1          | 3.7–7.1   | 2.7  | 2.1–3.5  | 9.2           | 6.3-13.4  | 4.7  | 3.4-6.4   |
| <b>Loneliness</b>                           |              |           |      |          |               |           |      |           |
| No                                          | 4.6          | 3.2–6.6   | 2.4  | 1.9–3.2  | 8.5           | 5.8-12.5  | 4.3  | 3.2-5.8   |
| Yes                                         | 11.2         | 7.9–15.6  | 5.2  | 3.6–7.4  | 18.5          | 12.5-26.6 | 9.0  | 6.2-13.1  |
| <b>Suicide attempt</b>                      |              |           |      |          |               |           |      |           |
| No                                          | 4.4          | 2.8–6.8   | 2.4  | 1.8–3.1  | 7.8           | 4.9-12.4  | 4.4  | 3.2-5.9   |
| Yes                                         | 9.4          | 6.8–12.7  | 4.7  | 3.3–6.7  | 19.9          | 13.4-28.5 | 8.3  | 5.3-12.6  |
| <b>Violence</b>                             |              |           |      |          |               |           |      |           |
| No                                          | 4.7          | 3.1–7.1   | 2.1  | 1.6–2.8  | 8.8           | 5.6-13.6  | 3.9  | 2.9-5.3   |
| Yes                                         | 7.8          | 6.1–9.9   | 8.4  | 5.8–11.9 | 12.0          | 9.2-15.5  | 10.1 | 7.1-14.0  |
| <b>Bullied</b>                              |              |           |      |          |               |           |      |           |
| No                                          | 5.0          | 3.3–7.7   | 2.5  | 1.9–3.3  | 8.6           | 5.3-13.7  | 4.5  | 3.3-6.1   |
| Yes                                         | 6.0          | 4.5–8.0   | 7.7  | 4.7–12.4 | 12.0          | 8.9-16.0  | 10.3 | 6.2-16.8  |
| <b>Sexual intercourse</b>                   |              |           |      |          |               |           |      |           |
| No                                          | 3.6          | 2.7–4.7   | 2.2  | 1.7–2.9  | 6.3           | 4.5-8.8   | 3.9  | 2.8-5.4   |
| Yes                                         | 25.4         | 17.0–36.3 | 12.2 | 8.4–17.6 | 36.7          | 25.6-49.5 | 17.1 | 11.5-24.8 |
| <b>Truancy</b>                              |              |           |      |          |               |           |      |           |
| No                                          | 3.4          | 2.5–4.6   | 2.0  | 1.4–2.7  | 5.9           | 4.2-8.4   | 3.7  | 2.5-5.5   |
| Yes                                         | 13.4         | 9.3–18.7  | 6.9  | 5.5–8.8  | 21.0          | 14.2-29.8 | 9.5  | 7.0-12.9  |
| <b>Drinking alcohol in the past 30 days</b> |              |           |      |          |               |           |      |           |
| No                                          | 2.0          | 1.3–3.0   | 1.2  | 0.8–1.7  | 3.8           | 2.3-6.3   | 2.2  | 1.5-3.3   |
| Yes                                         | 15.5         | 11.8–20.1 | 8.3  | 6.4–10.9 | 21.3          | 15.9-27.9 | 13.0 | 9.3-17.7  |
| <b>Sedentary behaviors</b>                  |              |           |      |          |               |           |      |           |
| No                                          | 4.3          | 3.1–6.1   | 2.5  | 1.7–3.7  | 7.9           | 5.3-11.6  | 4.6  | 3.1-6.7   |
| Yes                                         | 6.4          | 4.7–8.8   | 3.2  | 2.4–4.3  | 11.2          | 8.3-15.0  | 5.4  | 3.7-7.9   |
| <b>Low fruit/vegetables intake</b>          |              |           |      |          |               |           |      |           |
| No                                          | 5.5          | 3.1–9.4   | 4.2  | 2.0–8.6  | 10.0          | 5.0-18.9  | 4.7  | 2.3-9.4   |
| Yes                                         | 5.3          | 3.9–7.2   | 2.7  | 2.1–3.5  | 9.5           | 6.9-13.0  | 4.9  | 3.6-6.5   |

424

425

426 **Supplemental Table 2: Prevalence of e-cigarettes smoking by students' characteristics**  
 427

| Factor                                      | All students |          | Male students |          |
|---------------------------------------------|--------------|----------|---------------|----------|
|                                             | %            | 95% CI   | %             | 95% CI   |
| <b>Gender</b>                               |              |          |               |          |
| Male                                        | 3.6          | 2.7-4.8  | --            | --       |
| Female                                      | 1.5          | 0.9-2.5  | --            | --       |
| <b>Age</b>                                  |              |          |               |          |
| 13                                          | 3.1          | 1.5-6.2  | 3.8           | 1.5-9.1  |
| 14                                          | 1.8          | 1.0-3.0  | 2.1           | 1.2-3.5  |
| 15                                          | 1.9          | 1.3-3.0  | 3.0           | 1.8-4.9  |
| 16                                          | 2.5          | 1.6-3.8  | 3.6           | 2.3-5.5  |
| 17                                          | 3.9          | 2.4-6.2  | 6.7           | 4.1-10.8 |
| <b>Parental monitoring</b>                  |              |          |               |          |
| Low                                         | 3.2          | 2.4-4.3  | 4.9           | 3.4-6.9  |
| High                                        | 1.7          | 1.2-2.4  | 2.5           | 1.8-3.5  |
| <b>Parental understanding</b>               |              |          |               |          |
| Low                                         | 2.8          | 2.1-3.8  | 4.1           | 2.9-5.7  |
| High                                        | 2.2          | 1.5-3.2  | 3.3           | 2.3-4.8  |
| <b>Parental respect</b>                     |              |          |               |          |
| Low                                         | 5.1          | 3.4-7.7  | 6.5           | 3.9-10.6 |
| High                                        | 2.1          | 1.5-2.8  | 3.1           | 2.2-4.3  |
| <b>Have close friends</b>                   |              |          |               |          |
| No                                          | 3.4          | 2.1-5.5  | 4.8           | 2.6-8.7  |
| Yes                                         | 2.4          | 1.8-3.3  | 3.5           | 2.6-4.7  |
| <b>Loneliness</b>                           |              |          |               |          |
| No                                          | 2.1          | 1.5-3.0  | 3.2           | 2.3-4.5  |
| Yes                                         | 5.0          | 3.5-7.1  | 6.7           | 4.4-10.2 |
| <b>Suicide attempt</b>                      |              |          |               |          |
| No                                          | 2.0          | 1.4-2.7  | 3.1           | 2.2-4.2  |
| Yes                                         | 5.3          | 3.6-7.7  | 7.4           | 4.7-11.5 |
| <b>Violence</b>                             |              |          |               |          |
| No                                          | 2.1          | 1.4-3.0  | 3.2           | 2.3-4.3  |
| Yes                                         | 6.2          | 4.5-8.5  | 6.2           | 4.2-9.0  |
| <b>Bullied</b>                              |              |          |               |          |
| No                                          | 2.1          | 1.5-2.9  | 2.9           | 2.1-4.1  |
| Yes                                         | 10.1         | 6.7-14.9 | 13.3          | 8.7-19.7 |
| <b>Sexual intercourse</b>                   |              |          |               |          |
| No                                          | 2.1          | 1.5-2.8  | 2.9           | 2.2-4.0  |
| Yes                                         | 10.6         | 6.6-16.7 | 13.2          | 7.6-21.9 |
| <b>Truancy</b>                              |              |          |               |          |
| No                                          | 1.9          | 1.4-2.6  | 3.1           | 2.3-4.2  |
| Yes                                         | 5.5          | 3.6-8.2  | 5.4           | 3.4-8.3  |
| <b>Drinking alcohol in the past 30 days</b> |              |          |               |          |
| No                                          | 1.0          | 0.7-1.5  | 1.9           | 1.3-2.8  |
| Yes                                         | 7.5          | 5.5-10.2 | 8.9           | 6.5-12.1 |
| <b>Sedentary behaviors</b>                  |              |          |               |          |
| No                                          | 1.6          | 1.2-2.2  | 2.5           | 1.9-3.5  |
| Yes                                         | 3.7          | 2.7-5.0  | 5.4           | 3.8-7.6  |
| <b>Low fruit/vegetables intake</b>          |              |          |               |          |
| No                                          | 3.7          | 1.8-7.1  | 3.1           | 1.1-8.4  |
| Yes                                         | 2.4          | 1.8-3.3  | 3.7           | 2.7-4.9  |

428  
 429  
 430  
 431
